# Supplementary material for: The relative contributions of scattering and viscoelasticity to the attenuation of S waves in Earth's mantle
Source: Copernicus journal article supplement (doi:10.5194/se-11-161-2020), 2020-01-29
Supplement: Supplementary file 1 [file se-11-161-2020-supplement.zip]

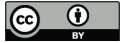

## *Supplement of*

# **The relative contributions of scattering and viscoelasticity to the attenuation of S waves in Earth's mantle**

Susini deSilva and Vernon F. Cormier

*Correspondence to:* Vernon F. Cormier ([vernon.cormier@uconn.edu](mailto:vernon.cormier@uconn.edu))

- [se-11-161-2020-supplement-title-page.pdf](#)
- SE\_SUPPLIMENTARY
  - .DS\_Store
  - MODEL1
    - \* 3D\_seis\_prem.txt
  - MODEL2
    - \* 3D\_seis\_S20RTSexp10km\_cut.txt
    - \* 3D\_seis\_S20RTSexp10km\_cut RAND2.txt
    - \* 3D\_seis\_S20RTSexp10km\_cut RAND3.txt
    - \* 3D\_seis\_S20RTSexp10km\_cut RAND4.txt
    - \* 3D\_seis\_S20RTSexp10km\_cut RAND5.txt
  - MODEL3
    - \* 3D\_seis\_CTZ2018CMB\_off\_cut.txt
    - \* 3D\_seis\_CTZ2018CMB\_off\_cut RAND2.txt
    - \* 3D\_seis\_CTZ2018CMB\_off\_cut RAND3.txt
    - \* 3D\_seis\_CTZ2018CMB\_off\_cut RAND4.txt
    - \* 3D\_seis\_CTZ2018CMB\_off\_cut RAND5.txt
  - MODEL4
    - \* 3D\_seis\_CTZ2018CMBv1\_cut.txt
    - \* 3D\_seis\_CTZ2018CMBv1\_cut RAND2.txt
    - \* 3D\_seis\_CTZ2018CMBv1\_cut RAND3.txt
    - \* 3D\_seis\_CTZ2018CMBv1\_cut RAND4.txt
    - \* 3D\_seis\_CTZ2018CMBv1\_cut RAND5.txt
  - MODEL5
    - \* 3D\_seis\_CTZ2018CMBv1\_A0\_cut.txt
    - \* 3D\_seis\_CTZ2018CMBv1\_A0\_cut RAND2.txt

- \* 3D\_seis\_CTZ2018CMBv1\_A0\_cut\_RAND3.txt
- \* 3D\_seis\_CTZ2018CMBv1\_A0\_cut\_RAND4.txt
- \* 3D\_seis\_CTZ2018CMBv1\_A0\_cut\_RAND5.txt
- README.md
- supp\_figs\_
  - \* .DS\_Store
  - \* Supplementary\_figs\_captions.docx
  - \* fig\_s01.eps
  - \* fig\_s02.eps

The copyright of individual parts of the supplement might differ from the CC BY 4.0 License.
